# Supplementary material
Source: HighWire-hosted journal article supplement (https://www.rcpjournals.org/highwire/filestream/13613/field_highwire_adjunct_files/0/de_Las_Casas_supplementary_material_S1.pdf)

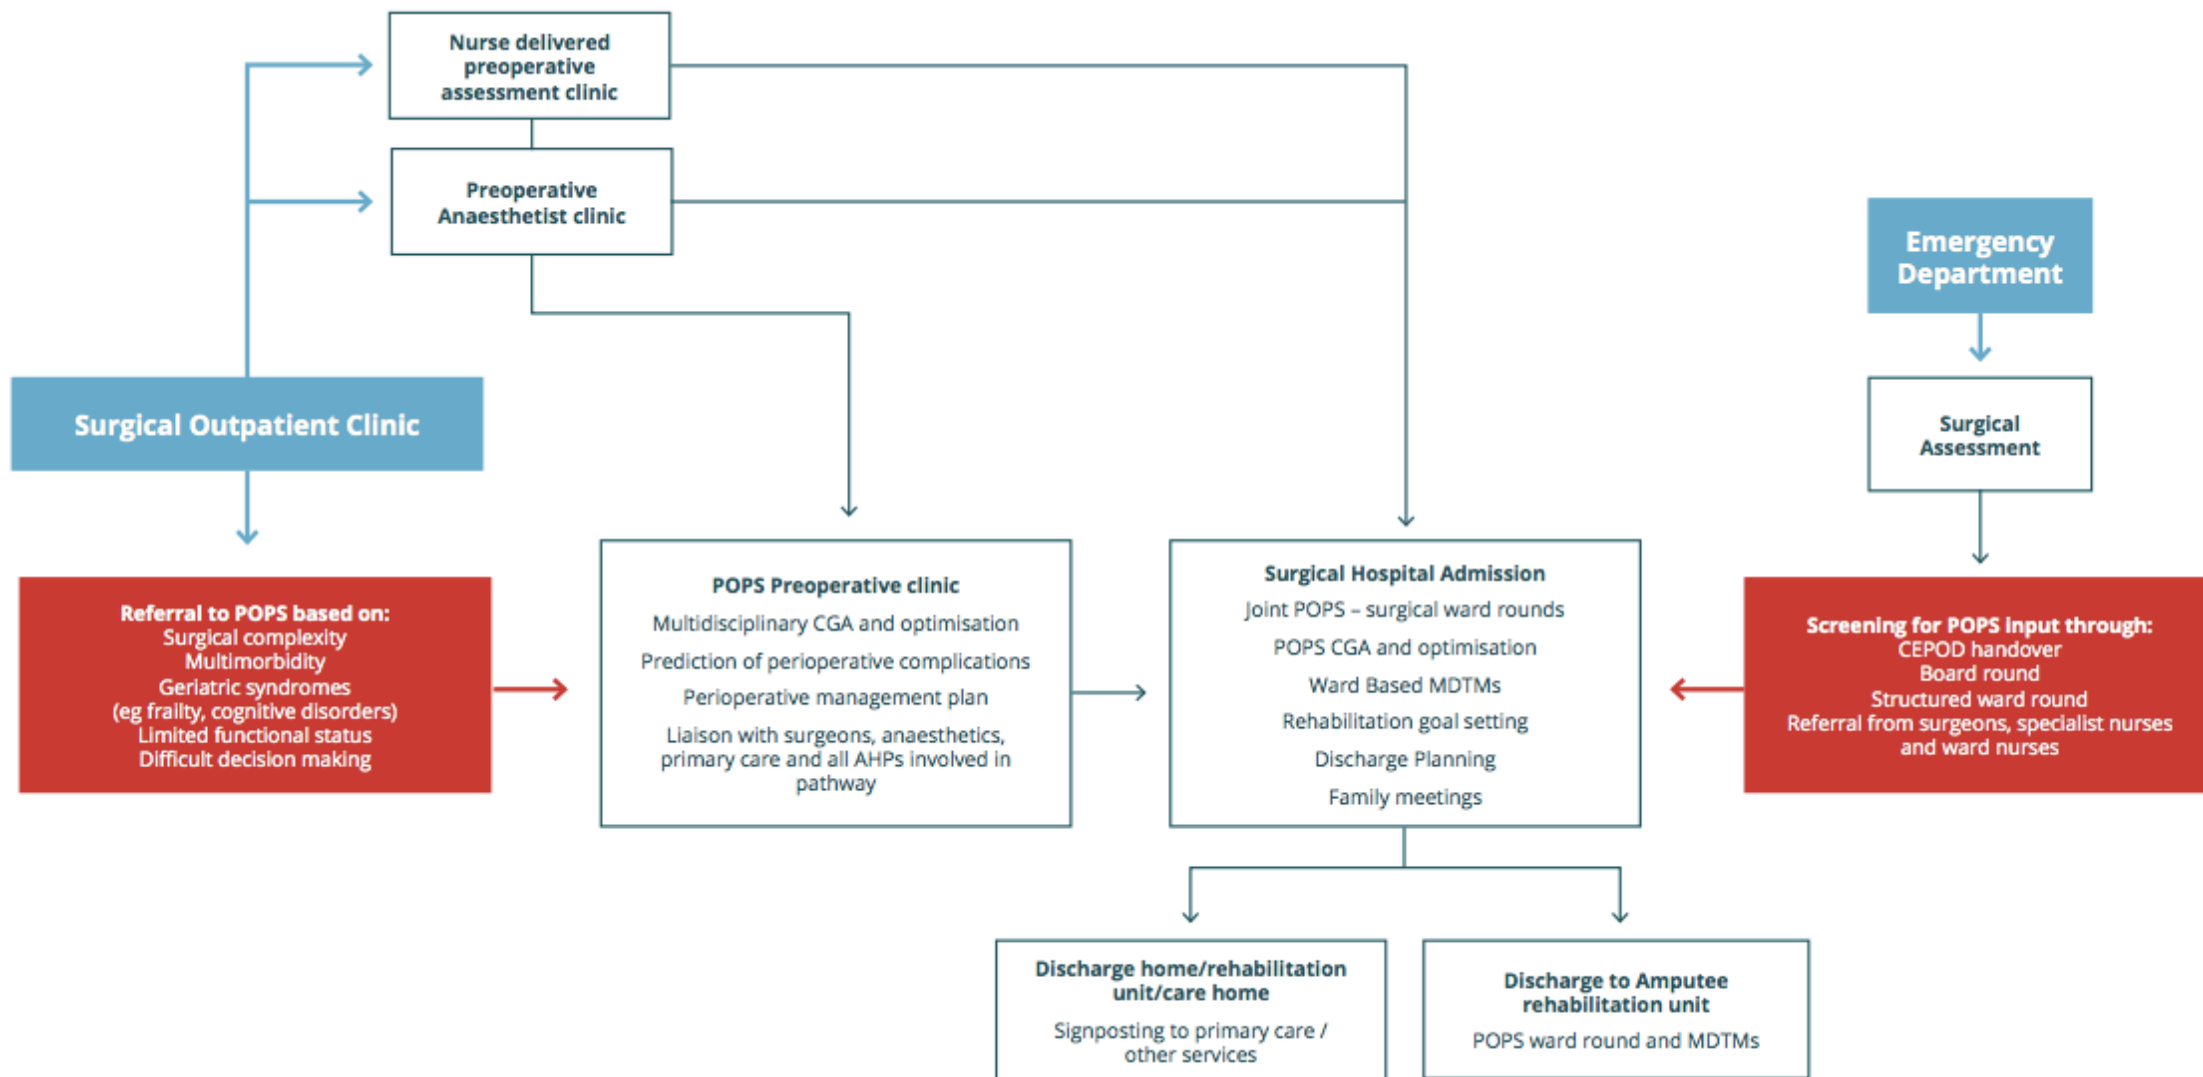

Supplement: de_Las_Casas_supplementary_material_S1.pdf [file de_Las_Casas_supplementary_material_S1.pdf]
